# Supplementary material
Source: Springer Nature journal article supplement (https://www.springermedizin.de/resource/supplementary/13033_2012_130_MOESM1_ESM.pdf/9651900)
Supplement: MOESM1 [file 9651900]

## **Depression**

**Meena** is 30 years old and was fine until six months ago when she began to feel tired all the time. She says that she is sad and has lost interest in life. Even her children and family don't make her feel happy. She cannot sleep, and she has lost the taste for food, which she used to love. She has also lost interest in cooking because she can't concentrate. Sometimes she feels like jumping in the well to end her life.

## **Psychosis**

**Ram** is 21 years old and is not married. He used to regularly help his father work on the farm, but for the last 10-15 days he has not been going to work. For the last 2-3 months he has been staying alone and aloof. He has not been bathing regularly and sometimes he becomes aggressive for no apparent reason, and once he even tried to hit his parents. He never used to behave in this way. On several occasions his father has found him talking to himself when nobody else was around. He has become suspicious of others and says that people are talking about him and that some people are keeping watch on him. For the last one week he has refused to eat food as he suspects his food is being poisoned by the neighbours. But his father refutes any truth in his suspicions.
